# Supplementary material for: Proteogenomic Analysis of Bacteria and Archaea: A 46 Organism Case Study
Source: PLoS One. 2011 Nov 17;6(11):e27587. doi: 10.1371/journal.pone.0027587 (PMC3219674; doi:10.1371/journal.pone.0027587)
Supplement: Table S1 — List of organisms presented in this study. Along with each organism is listed the following information: the percent GC of the genome, the date of genome submission to genbank, the RefSeq accession of the primary chromosome, the genome size in megabases, the number of novel genes discovered through proteogenomics, the number of genes for which proteomics data suggests a new start site, the number of validated signal peptide cleavages, the total number of peptides discovered in the MS/MS data for an organism. (XLSX) [file pone.0027587.s007.xlsx]

## Sheet: FOrmatted - resubmit
Organism	Percent GC in Genome	Date of Annotation	RefSeq Accession of Primary Chromosome	Genome Size (MB)	Number of Novel Genes	Number of New Start Genes	Number of Identified SPaseI cleavages	Number of Identified Peptides
Acidiphilium cryptum JF-5	67	2007	NC_009484	3.3	16	4	48	8591
Actinosynnema mirum DSM 43827	73	2009	NC_013093	8.2	1	20	6	13601
Anabaena variabilis	41	2005	NC_007413	6.3	3	19	31	28488
Anaplasma phagocytophilium	41	2006	NC_007797	1.4	6	6	1	2271
Arthrobacter FB24	65	2006	NC_008541	5	20	77	8	44823
Bacillus anthracis sterne	35	2004	NC_005945	5.2	3	4	4	15162
Brachybacterium faecium DSM 4810	72	2009	NC_013172	3.6	5	28	3	24222
Caulobacter crescentus NA1000	67	2009	NC_011916	4	26	54	83	54516
Cellulomonas flavigena DSM 20109	74	2010	NC_014151	4.1	12	44	6	45128
Chlorobaculum tepidum WT	56	2002	NC_002932	2.1	33	57	25	23403
Chloroflexus aurantiacus	56	2007	NC_010175	5.2	16	9	4	39855
Clostridium thermocellum	38	2007	NC_009012	3.8	1	1	12	2291
Cryptobacterium curtum DSM 15641	50	2009	NC_013170	1.6	8	23	4	13590
Cyanobacterium synechocystis PCC6803	47	2001	NC_000911	3.9	7	20	30	21621
Cyanothece ATCC51142	37	2008	NC_010546	5.3	5	11	27	32027
Deinococcus radiodurans R1	67	2001	NC_001263	3.2	113	61	67	34021
Desulfovibrio desulfuricans G20	57	2005	NC_007519	3.7	15	27	50	41277
Desulfovibrio vulgaris Hildenborough	63	2004	NC_002937	3.7	43	81	46	30132
Escherichia coli K 12	50	2001	NC_000913	4.6	6	14	86	38757
Geobacter metallireducens GS15	59	2005	NC_007517	4	6	10	62	26456
Geobacter sulfurreducens PCA	60	2002	NC_002939	3.8	38	52	51	28111
Geobacter uraniumreducens	54	2007	NC_009483	5.1	13	18	75	36614
Halogeometricum borinquense DSM 11551	61	2010	NC_014729	2.8	7	20	6	14373
Halorhabdus utahensis DSM 12940	62	2009	NC_013158	3.1	2	12	1	12461
Heliobacterium modesticaldum	56	2008	NC_010337	3	15	43	7	20530
Kineococcus radiotolerans SRS30216	74	2007	NC_009664	4.9	23	53	7	39131
Methanosarcina barkeri str. fusaro	39	2005	NC_007355	4.8	20	27	9	21357
Mycobacterium tuberculosis H37rv	65	2001	NC_000962	4.4	15	59	21	23451
Nakamurella multipartita DSM 44233	70	2009	NC_013235	6	7	40	14	23082
Nocardiopsis dassonvillei DSM 43111	72	2010	NC_014210	6.4	5	15	3	15676
Novosphingobium aromaticivorans	65	2006	NC_007794	3.5	3	1	17	13308
Pelobacter carbinolicus DSM 2380	55	2005	NC_007498	3.6	1	1	1	4502
Prochlorococcus marinus	30	2003	NC_005072	1.6	19	9	25	16741
Rhodobacter capsulatus SB1003	66	2010	NC_014034	3.8	10	40	81	51559
Rhodobacter sphaeroides 2.4.1	69	2005	NC_007493	4.4	72	92	67	50465
Roseiflexus castenholzii DSM 13941	60	2007	NC_009767	5.7	6	7	6	28541
Saccharomonospora viridis DSM 43017	67	2009	NC_013159	4.3	2	33	1	14523
Sanguibacter keddieii DSM 10542	71	2009	NC_013521	4.2	1	52	5	18790
Slackia heliotrinireducens DSM 20476	60	2009	NC_013165	3.1	5	30	4	17901
Stackebrandtia nassauensis DSM 44728	68	2010	NC_013947	6.8	13	24	6	20550
Streptococcus pyogenes M1	38	2001	NC_002737	1.8	10	0	4	6181
Synechococcus PCC 7002	49	2008	NC_010475	3	22	33	39	28783
Syntrophobacter fumaroxidans	59	2006	NC_008554	5	19	21	27	20952
Thermobispora bispora DSM 43833	72	2010	NC_014165	4.1	0	7	4	7652
Xylanimonas cellulosilytica DSM 15894	72	2009	NC_013530	3.7	5	72	9	41059
Yersinia pestis KIM	47	2002	NC_004088	4.7	4	5	82	9209
