# Supplementary material for: Proteogenomic Analysis of Bacteria and Archaea: A 46 Organism Case Study
Source: PLoS One. 2011 Nov 17;6(11):e27587. doi: 10.1371/journal.pone.0027587 (PMC3219674; doi:10.1371/journal.pone.0027587)
Supplement: Table S2 — Gene conflicts. This table presents the number of conflicting loci, separated by type, for each genome. (XLS) [file pone.0027587.s008.xls]

## Sheet: Sheet1
	Conflict level
Organism	3	4	5	6
Acidiphilium cryptum JF-5	5	7	1	1
Actinosynnema mirum DSM 43827	1	3	0	0
Anabaena variabilis	5	0	0	0
Anaplasma phagocytophilium	2	0	0	0
Arthrobacter FB24	2	5	2	1
Bacillus anthracis sterne	5	2	1	1
Brachybacterium faecium DSM 4810	2	4	0	2
Caulobacter crescentus NA1000	37	14	22	14
Cellulomonas flavigena DSM 20109	4	4	0	4
Chlorobaculum tepidum WT	33	3	9	5
Chloroflexus aurantiacus	2	4	1	3
Clostridium thermocellum	0	0	0	0
Cryptobacterium curtum DSM 15641	0	1	1	0
Cyanobacterium synechocystis PCC6803	13	4	13	3
Cyanothece ATCC51142	18	2	6	1
Deinococcus radiodurans R1	31	5	19	22
Desulfovibrio desulfuricans G20	7	2	5	4
Desulfovibrio vulgaris Hildenborough	21	5	7	3
Escherichia coli K 12	0	3	1	0
Geobacter metallireducens GS15	5	3	3	2
Geobacter sulfurreducens PCA	21	8	3	1
Geobacter uraniumreducens	2	2	2	0
Halogeometricum borinquense DSM 11551	0	0	0	1
Halorhabdus utahensis DSM 12940	1	2	1	0
Heliobacterium modesticaldum	15	1	3	3
Kineococcus radiotolerans SRS30216	11	12	3	12
Methanosarcina barkeri str. fusaro	1	2	1	0
Mycobacterium tuberculosis H37rv	14	17	3	3
Nakamurella multipartita DSM 44233	5	3	0	2
Nocardiopsis dassonvillei DSM 43111	2	3	0	0
Novosphingobium aromaticivorans	2	2	1	0
Pelobacter carbinolicus DSM 2380	1	0	0	0
Prochlorococcus marinus	2	2	2	1
Rhodobacter capsulatus SB1003	6	4	0	5
Rhodobacter sphaeroides 2.4.1	7	7	3	17
Roseiflexus castenholzii DSM 13941	5	11	0	2
Saccharomonospora viridis DSM 43017	3	3	0	1
Sanguibacter keddieii DSM 10542	3	3	0	3
Slackia heliotrinireducens DSM 20476	1	0	0	0
Stackebrandtia nassauensis DSM 44728	7	17	0	2
Streptococcus pyogenes M1	2	1	0	0
Synechococcus PCC 7002	8	3	2	4
Syntrophobacter fumaroxidans	3	2	1	1
Thermobispora bispora DSM 43833	1	5	0	0
Xylanimonas cellulosilytica DSM 15894	3	6	0	4
Yersinia pestis KIM	4	7	1	0
	3.5	3	1	1		median
	8.91313	4.13071	4.68428	4.60393		stdev
	7.02174	4.21739	2.54348	2.78261		average
