# Supplementary material for: Proteogenomic Analysis of Bacteria and Archaea: A 46 Organism Case Study
Source: PLoS One. 2011 Nov 17;6(11):e27587. doi: 10.1371/journal.pone.0027587 (PMC3219674; doi:10.1371/journal.pone.0027587)
Supplement: Table S3 — Change in conflicted loci according to PSM specificity. For each organism, the number of conflicts (levels 4,5,6) are shown at two different PSM specificity cutoffs, a loose 5e-08 and the default 1e-10. With the loose cutoff there is often a much larger number of conflicted loci, indicating a high false-discovery at the protein level. (XLS) [file pone.0027587.s009.xls]

## Sheet: Formatted
	PSM Cutoff
Organism	5e-08	1e-10	inflation due to poor FDR
Acidiphilium cryptum JF-5	20	9	2.22222
Actinosynnema mirum DSM 43827	11	3	3.66667
Anabaena variabilis	13	0	undef
Anaplasma phagocytophilium	1	0	undef
Arthrobacter FB24	25	8	3.125
Bacillus anthracis sterne	7	4	1.75
Brachybacterium faecium DSM 4810	35	6	5.83333
Caulobacter crescentus NA1000	261	49	5.32653
Cellulomonas flavigena DSM 20109	198	8	24.75
Chlorobaculum tepidum WT	77	17	4.52941
Chloroflexus aurantiacus	9	8	1.125
Clostridium thermocellum	0	0	undef
Cryptobacterium curtum DSM 15641	3	2	1.5
Cyanobacterium synechocystis PCC6803	24	20	1.2
Cyanothece ATCC51142 (*)	28	9	3.11111
Deinococcus radiodurans R1	67	46	1.45652
Desulfovibrio desulfuricans G20 (*)	89	11	8.09091
Desulfovibrio vulgaris Hildenborough	40	15	2.66667
Escherichia coli K 12	39	4	9.75
Geobacter metallireducens GS15 (*)	24	8	3
Geobacter sulfurreducens PCA	26	12	2.16667
Geobacter uraniumreducens (*)	27	4	6.75
Halogeometricum borinquense DSM 11551	2	1	2
Halorhabdus utahensis DSM 12940	4	3	1.33333
Heliobacterium modesticaldum	25	7	3.57143
Kineococcus radiotolerans SRS30216 (*)	117	27	4.33333
Methanosarcina barkeri str. fusaro	6	3	2
Mycobacterium tuberculosis H37rv	30	23	1.30435
Nakamurella multipartita DSM 44233	13	5	2.6
Nocardiopsis dassonvillei DSM 43111	13	3	4.33333
Novosphingobium aromaticivorans	3	3	1
Pelobacter carbinolicus DSM 2380	0	0	undef
Prochlorococcus marinus	7	5	1.4
Rhodobacter capsulatus SB1003	226	9	25.1111
Rhodobacter sphaeroides 2.4.1	172	27	6.37037
Roseiflexus castenholzii DSM 13941	29	13	2.23077
Saccharomonospora viridis DSM 43017	5	4	1.25
Sanguibacter keddieii DSM 10542	9	6	1.5
Slackia heliotrinireducens DSM 20476	0	0	undef
Stackebrandtia nassauensis DSM 44728	22	19	1.15789
Streptococcus pyogenes M1	1	1	1
Synechococcus PCC 7002	11	9	1.22222
Syntrophobacter fumaroxidans	7	4	1.75
Thermobispora bispora DSM 43833	5	5	1
Xylanimonas cellulosilytica DSM 15894	57	10	5.7
Yersinia pestis KIM	8	8	1
			4.02898	mean
			2.22222	median
			5.2384	stdev
(*) indates a dataset for which we used a more stringent PSM cutoff to keep the peptide FDR near 5%, e.g. 1e-08.
